# Supplementary material
Source: PubMed Central journal article supplement (PMC9721839)
Supplement: mmc1.pdf [file mmc1.pdf]

# THE LANCET

## Infectious Diseases

### Supplementary appendix

This appendix formed part of the original submission and has been peer reviewed.  
We post it as supplied by the authors.

Supplement to: Hoffmann M, Behrens GMN, Arora P, et al. Effect of hybrid immunity and bivalent booster vaccination on omicron sublineage neutralisation. *Lancet Infect Dis* 2022; published online Dec 5. [https://doi.org/10.1016/S1473-3099\(22\)00792-7](https://doi.org/10.1016/S1473-3099(22)00792-7).

# Appendix

## Omicron sublineage-specific neutralisation activity elicited upon triple vaccination, breakthrough infection, and monovalent or bivalent vaccine boosters

### Content

|                                |    |
|--------------------------------|----|
| Table 1 .....                  | 1  |
| Table 2 .....                  | 6  |
| Table 3 .....                  | 7  |
| Table 4 .....                  | 8  |
| Methods .....                  | 9  |
| Limitations of the study ..... | 13 |
| Acknowledgements.....          | 14 |
| Supplementary references.....  | 15 |
| Supplementary figures.....     | 16 |

**Table 1**

**Table 1: Plasma information**

| Cohort                    | ID     | Gender | Age (years) | V1/V2/V3    | Post V3 BTI (yes/no) | V4 | Post V4 BTI (yes/no) | Time between sampling and last vaccination (days) | Time between sampling and positive PCR test last vaccination (days) | Anti-SARS-CoV-2 S1 IgG (BAU/ml) |
|---------------------------|--------|--------|-------------|-------------|----------------------|----|----------------------|---------------------------------------------------|---------------------------------------------------------------------|---------------------------------|
| V1/V2/V3*                 | 7423   | Male   | 33          | BNT/BNT/BNT | no                   | no | no                   | 19                                                | n.a.                                                                | 6019                            |
|                           | 7531   | Female | 27          | BNT/BNT/BNT | no                   | no | no                   | 14                                                | n.a.                                                                | 3466                            |
|                           | 7543   | Female | 53          | BNT/BNT/BNT | no                   | no | no                   | 41                                                | n.a.                                                                | 4243                            |
|                           | 7551   | Male   | 59          | BNT/BNT/BNT | no                   | no | no                   | 13                                                | n.a.                                                                | 4297                            |
|                           | 7855   | Female | 38          | AZ/BNT/BNT  | no                   | no | no                   | 14                                                | n.a.                                                                | 6963                            |
|                           | 7857   | Male   | 51          | AZ/BNT/BNT  | no                   | no | no                   | 14                                                | n.a.                                                                | 3287                            |
|                           | 7863   | Female | 38          | AZ/BNT/BNT  | no                   | no | no                   | 14                                                | n.a.                                                                | 4836                            |
|                           | 7866   | Female | 59          | AZ/BNT/BNT  | no                   | no | no                   | 14                                                | n.a.                                                                | 7420                            |
|                           | 7871   | Male   | 42          | AZ/AZ/BNT   | no                   | no | no                   | 14                                                | n.a.                                                                | 5483                            |
|                           | 7884   | Female | 34          | BNT/BNT/BNT | no                   | no | no                   | 39                                                | n.a.                                                                | 4577                            |
|                           | 7911   | Female | 54          | AZ/BNT/BNT  | no                   | no | no                   | 14                                                | n.a.                                                                | 5021                            |
|                           | 7938   | Female | 53          | AZ/BNT/BNT  | no                   | no | no                   | 16                                                | n.a.                                                                | 5191                            |
|                           | 7960   | Male   | 39          | BNT/BNT/BNT | no                   | no | no                   | 24                                                | n.a.                                                                | 4202                            |
|                           | 7973   | Female | 53          | BNT/BNT/BNT | no                   | no | no                   | 24                                                | n.a.                                                                | 6003                            |
|                           | 7974   | Female | 59          | BNT/BNT/BNT | no                   | no | no                   | 45                                                | n.a.                                                                | 4077                            |
| 8051                      | Female | 56     | BNT/BNT/BNT | no          | no                   | no | 14                   | n.a.                                              | 3048                                                                |                                 |
| V1/V2/V3 + BTI(BA.1/BA.2) | 8601   | Female | 43          | BNT/BNT/BNT | yes (BA.1/2 wave)    | no | no                   | 102                                               | 31                                                                  | 4233                            |
|                           | 8628   | Female | 38          | AZ/BNT/BNT  | yes (BA.1/2 wave)    | no | no                   | 123                                               | 48                                                                  | 7211                            |
|                           | 8650   | Female | 38          | AZ/BNT/BNT  | yes (BA.1/2 wave)    | no | no                   | 128                                               | 14                                                                  | 2046                            |
|                           | 8651   | Female | 35          | AZ/BNT/BNT  | yes (BA.1/2 wave)    | no | no                   | 128                                               | 23                                                                  | 1713                            |
|                           | 8667   | Female | 50          | AZ/AZ/BNT   | yes (BA.1/2 wave)    | no | no                   | 118                                               | 13                                                                  | 4072                            |
|                           | 8668   | Female | 40          | BNT/BNT/BNT | yes (BA.1/2 wave)    | no | no                   | 140                                               | 56                                                                  | 4166                            |
|                           | 8669   | Female | 22          | AZ/BNT/BNT  | yes (BA.1/2 wave)    | no | no                   | 132                                               | 36                                                                  | 5048                            |
|                           | 8694   | Male   | 46          | BNT/BNT/BNT | yes (BA.1/2 wave)    | no | no                   | 131                                               | 8                                                                   | 3824                            |
|                           | 8704   | Female | 39          | AZ/BNT/BNT  | yes (BA.1/2 wave)    | no | no                   | 128                                               | 24                                                                  | 5395                            |
|                           | 8706   | Male   | 30          | AZ/BNT/BNT  | yes (BA.1/2 wave)    | no | no                   | 134                                               | 30                                                                  | 7323                            |
|                           | 8711   | Female | 30          | AZ/BNT/BNT  | yes (BA.1/2 wave)    | no | no                   | 128                                               | 21                                                                  | 9077                            |

|                      |        |        |             |                    |                      |    |     |     |      |      |
|----------------------|--------|--------|-------------|--------------------|----------------------|----|-----|-----|------|------|
|                      | 8712   | Female | 39          | AZ/BNT/BNT         | yes<br>(BA.1/2 wave) | no | no  | 134 | 59   | 2440 |
|                      | 8717   | Female | 38          | AZ/BNT/BNT         | yes<br>(BA.1/2 wave) | no | no  | 136 | 31   | 2970 |
|                      | 8720   | Female | 35          | AZ/BNT/BNT         | yes<br>(BA.1/2 wave) | no | no  | 136 | 31   | 2365 |
|                      | 8745   | Female | 41          | BNT/BNT/BNT        | yes<br>(BA.1/2 wave) | no | no  | 173 | 62   | 1822 |
|                      | 8754   | Male   | 36          | AZ/BNT/BNT         | yes<br>(BA.1/2 wave) | no | no  | 164 | 44   | 3399 |
|                      | 8780   | Male   | 38          | AZ/BNT/BNT         | yes<br>(BA.1/2 wave) | no | no  | 144 | 31   | 9237 |
| VI/V2/V3 + BTI(BA.5) | 9004   | Male   | 36          | BNT/BNT/MOD        | yes<br>(BA.5 wave)   | no | no  | 223 | 25   | 6567 |
|                      | 9027   | Female | 24          | AZ/BNT/BNT         | yes<br>(BA.5 wave)   | no | no  | 219 | 10   | 4662 |
|                      | 9029   | Female | 29          | BNT/BNT/BNT        | yes<br>(BA.5 wave)   | no | no  | 214 | 22   | 6618 |
|                      | 9061   | Female | 55          | AZ/AZ/BNT          | yes<br>(BA.5 wave)   | no | no  | 263 | 31   | 5452 |
|                      | 9063   | Female | 62          | AZ/BNT/BNT         | yes<br>(BA.5 wave)   | no | no  | 273 | 41   | 4891 |
|                      | 9071   | Female | 46          | AZ/AZ/MOD          | yes<br>(BA.5 wave)   | no | no  | 249 | 49   | 5499 |
|                      | 9072   | Female | 31          | AZ/BNT/BNT         | yes<br>(BA.5 wave)   | no | no  | 274 | 36   | 2392 |
|                      | 9092   | Male   | 43          | AZ/BNT/BNT         | yes<br>(BA.5 wave)   | no | no  | 261 | 16   | 5495 |
|                      | 9099   | Female | 39          | AZ/AZ/BNT          | yes<br>(BA.5 wave)   | no | no  | 279 | 33   | 6023 |
|                      | 9108   | Female | 53          | BNT/BNT/MOD        | yes<br>(BA.5 wave)   | no | no  | 253 | 15   | 4515 |
|                      | 9112   | Female | 53          | BNT/BNT/BNT        | yes<br>(BA.5 wave)   | no | no  | 280 | 31   | 6801 |
|                      | 9142   | Female | 34          | AZ/BNT/BNT         | yes<br>(BA.5 wave)   | no | no  | 284 | 53   | 2922 |
|                      | 9144   | Female | 50          | AZ/AZ/MOD          | yes<br>(BA.5 wave)   | no | no  | 275 | 31   | 7392 |
|                      | 9145   | Female | 37          | BNT/BNT/MOD        | yes<br>(BA.5 wave)   | no | no  | 249 | 31   | 4194 |
|                      | 9166   | Female | 34          | BNT/BNT/BNT        | yes<br>(BA.5 wave)   | no | no  | 152 | 40   | 6810 |
|                      | 9189   | Male   | 63          | BNT/BNT/BNT        | yes<br>(BA.5 wave)   | no | no  | 316 | 27   | 6661 |
| 9202                 | Female | 35     | BNT/BNT/BNT | yes<br>(BA.5 wave) | no                   | no | 252 | 59  | 4818 |      |

|                                                |        |        |             |             |                    |              |                    |      |      |       |
|------------------------------------------------|--------|--------|-------------|-------------|--------------------|--------------|--------------------|------|------|-------|
|                                                | 9232   | Male   | 38          | BNT/BNT/BNT | yes<br>(BA.5 wave) | no           | no                 | 275  | 58   | 6338  |
|                                                | 9238   | Female | 51          | BNT/BNT/BNT | yes<br>(BA.5 wave) | no           | no                 | 192  | 28   | 4170  |
|                                                | 9247   | Female | 48          | BNT/BNT/BNT | yes<br>(BA.5 wave) | no           | no                 | 291  | 52   | 4974  |
|                                                | 9271   | Female | 43          | BNT/BNT/BNT | yes<br>(BA.5 wave) | no           | no                 | 292  | 12   | 2768  |
|                                                | 9290   | Female | 28          | BNT/BNT/BNT | yes<br>(BA.5 wave) | no           | no                 | 266  | 16   | 2557  |
|                                                | 9297   | Female | 36          | BNT/BNT/BNT | yes<br>(BA.5 wave) | no           | no                 | 287  | 11   | 3551  |
|                                                | 9316   | Female | 31          | AZ/BNT/BNT  | yes<br>(BA.5 wave) | no           | no                 | 230  | 59   | 1602  |
|                                                | 9334   | Male   | 51          | BNT/BNT/BNT | yes<br>(BA.5 wave) | no           | no                 | 324  | 23   | 4845  |
|                                                | 9335   | Female | 26          | BNT/BNT/BNT | yes<br>(BA.5 wave) | no           | no                 | 324  | 57   | 6751  |
|                                                | 9358   | Female | 36          | BNT/BNT/MOD | yes<br>(BA.5 wave) | no           | no                 | 279  | 47   | 7600  |
| V1/V2/V3/V4 <sub>monovalent</sub> <sup>a</sup> | 8221   | Male   | 48          | AZ/AZ/BNT   | no                 | yes<br>(BNT) | no                 | 30   | n.a. | 1826  |
|                                                | 8380   | Male   | 49          | AZ/BNT/BNT  | no                 | yes<br>(BNT) | no                 | 42   | n.a. | 2022  |
|                                                | 8383   | Male   | 44          | BNT/BNT/BNT | no                 | yes<br>(BNT) | no                 | 37   | n.a. | 8018  |
|                                                | 8391   | Female | 38          | BNT/BNT/BNT | no                 | yes<br>(BNT) | no                 | 40   | n.a. | 2341  |
|                                                | 8808   | Female | 59          | AZ/BNT/BNT  | no                 | yes<br>(BNT) | no                 | 7    | n.a. | 4709  |
|                                                | 8830   | Male   | 65          | AZ/AZ/BNT   | no                 | yes<br>(BNT) | no                 | 9    | n.a. | 1931  |
|                                                | 8864   | Female | 49          | BNT/BNT/BNT | no                 | yes<br>(BNT) | no                 | 46   | n.a. | 7836  |
|                                                | 9292   | Female | 31          | BNT/BNT/BNT | no                 | yes<br>(BNT) | no                 | 51   | n.a. | 5424  |
|                                                | 9310   | Male   | 53          | BNT/BNT/BNT | no                 | yes<br>(BNT) | no                 | 2    | n.a. | 4990  |
|                                                | 9351   | Female | 27          | BNT/BNT/BNT | no                 | yes<br>(BNT) | no                 | 29   | n.a. | 11368 |
| 9357                                           | Female | 58     | BNT/BNT/BNT | no          | yes<br>(BNT)       | no           | 33                 | n.a. | 1668 |       |
| V1/V2/V3/V4 <sub>monovalent</sub> + BTT(BA.5)  | 8973   | Female | 30          | BNT/BNT/MOD | no                 | yes<br>(BNT) | yes<br>(BA.5 wave) | 85   | 8    | 3104  |
|                                                | 9178   | Female | 29          | BNT/BNT/BNT | no                 | yes<br>(BNT) | yes<br>(BA.5 wave) | 148  | 60   | 1596  |
|                                                | 9308   | Female | 38          | BNT/BNT/BNT | no                 | yes<br>(BNT) | yes<br>(BA.5 wave) | 230  | 44   | 1852  |
|                                                | 9314   | Male   | 31          | BNT/BNT/BNT | no                 | yes<br>(BNT) | yes<br>(BA.5 wave) | 143  | 30   | 12250 |
|                                                | 9318   | Male   | 49          | AZ/BNT/BNT  | no                 | yes<br>(BNT) | yes<br>(BA.5 wave) | 232  | 35   | 6341  |
|                                                | 9326   | Male   | 59          | BNT/BNT/BNT | no                 | yes<br>(BNT) | yes<br>(BA.5 wave) | 107  | 48   | 9730  |

|                                                    |        |        |                |                |                                   |                                   |                    |      |                      |       |
|----------------------------------------------------|--------|--------|----------------|----------------|-----------------------------------|-----------------------------------|--------------------|------|----------------------|-------|
|                                                    | 9349   | Female | 55             | BNT/BNT/BNT    | no                                | yes<br>(BNT)                      | yes<br>(BA.5 wave) | 83   | 15                   | 5474  |
|                                                    | 9354   | Female | 43             | BNT/BNT/BNT    | no                                | yes<br>(BNT)                      | yes<br>(BA.5 wave) | 181  | 45                   | 9082  |
| V1/V2/V3/V4 <sub>bivalent</sub> <sup>a</sup>       | 9387   | Female | 59             | BNT/BNT/BNT    | no                                | yes<br>(BNT <sub>bivalent</sub> ) | no                 | 27   | n.a.                 | 6161  |
|                                                    | 9413   | Female | 38             | BNT/BNT/BNT    | no                                | yes<br>(BNT <sub>bivalent</sub> ) | no                 | 29   | n.a.                 | 3183  |
|                                                    | 9445   | Male   | 65             | AZ/AZ/BNT      | no                                | yes<br>(BNT <sub>bivalent</sub> ) | no                 | 27   | n.a.                 | 7177  |
|                                                    | 9446   | Female | 61             | BNT/BNT/BNT    | no                                | yes<br>(BNT <sub>bivalent</sub> ) | no                 | 27   | n.a.                 | 5104  |
|                                                    | 9448   | Female | 56             | BNT/BNT/BNT    | no                                | yes<br>(BNT <sub>bivalent</sub> ) | no                 | 11   | n.a.                 | 7945  |
|                                                    | 9452   | Male   | 44             | no information | no                                | yes<br>(BNT <sub>bivalent</sub> ) | no                 | 27   | n.a.                 | 12697 |
|                                                    | 9472   | Female | 54             | no information | no                                | yes<br>(BNT <sub>bivalent</sub> ) | no                 | 33   | n.a.                 | 2720  |
|                                                    | 9474   | Female | 54             | no information | no                                | yes<br>(BNT <sub>bivalent</sub> ) | no                 | 33   | n.a.                 | 2629  |
|                                                    | 9476   | Female | 51             | no information | no                                | yes<br>(BNT <sub>bivalent</sub> ) | no                 | 33   | n.a.                 | 5429  |
|                                                    | 9477   | Male   | 52             | no information | no                                | yes<br>(BNT <sub>bivalent</sub> ) | no                 | 33   | n.a.                 | 2374  |
|                                                    | 9479   | Male   | 62             | no information | no                                | yes<br>(BNT <sub>bivalent</sub> ) | no                 | 33   | n.a.                 | 5576  |
|                                                    | 9481   | Female | 58             | no information | no                                | yes<br>(BNT <sub>bivalent</sub> ) | no                 | 23   | n.a.                 | 8758  |
|                                                    | 9484   | Male   | 45             | no information | no                                | yes<br>(BNT <sub>bivalent</sub> ) | no                 | 33   | n.a.                 | 7828  |
|                                                    | 9485   | Male   | 68             | no information | no                                | yes<br>(BNT <sub>bivalent</sub> ) | no                 | 26   | n.a.                 | 2639  |
|                                                    | 9486   | Female | 52             | no information | no                                | yes<br>(BNT <sub>bivalent</sub> ) | no                 | 23   | n.a.                 | 8519  |
|                                                    | 9488   | Male   | 54             | no information | no                                | yes<br>(BNT <sub>bivalent</sub> ) | no                 | 26   | n.a.                 | 2644  |
|                                                    | 9491   | Female | 46             | no information | no                                | yes<br>(BNT <sub>bivalent</sub> ) | no                 | 33   | n.a.                 | 4773  |
|                                                    | 9493   | Female | 61             | no information | no                                | yes<br>(BNT <sub>bivalent</sub> ) | no                 | 28   | n.a.                 | 4819  |
| 9494                                               | Female | 50     | no information | no             | yes<br>(BNT <sub>bivalent</sub> ) | no                                | 33                 | n.a. | 3610                 |       |
| 9495                                               | Male   | 54     | no information | no             | yes<br>(BNT <sub>bivalent</sub> ) | no                                | 33                 | n.a. | 2862                 |       |
| 9496                                               | Male   | 40     | BNT/BNT/MOD    | no             | yes<br>(BNT <sub>bivalent</sub> ) | no                                | 33                 | n.a. | 8194                 |       |
| V1/V2/V3 + BTI(BA.1/BA.2) + V4 <sub>bivalent</sub> | 9447   | Female | 47             | BNT/BNT/BNT    | yes<br>(BA.1/2 wave)              | yes<br>(BNT <sub>bivalent</sub> ) | no                 | 25   | 222                  | 6583  |
|                                                    | 9468   | Female | 48             | no information | yes<br>(BA.1/2 wave)              | yes<br>(BNT <sub>bivalent</sub> ) | no                 | 33   | 155-185 <sup>b</sup> | 5231  |
|                                                    | 9469   | Female | 44             | no information | yes<br>(BA.1/2 wave)              | yes<br>(BNT <sub>bivalent</sub> ) | no                 | 33   | 233                  | 11589 |
|                                                    | 9470   | Female | 22             | no information | yes<br>(BA.1/2 wave)              | yes<br>(BNT <sub>bivalent</sub> ) | no                 | 33   | 186-215 <sup>b</sup> | 5343  |
|                                                    | 9471   | Male   | 40             | no information | yes<br>(BA.1/2 wave)              | yes<br>(BNT <sub>bivalent</sub> ) | no                 | 33   | 247-274 <sup>b</sup> | 7462  |
|                                                    | 9473   | Female | 58             | no information | yes<br>(BA.1/2 wave)              | yes<br>(BNT <sub>bivalent</sub> ) | no                 | 33   | 210                  | 10400 |
|                                                    | 9478   | Female | 42             | no information | yes<br>(BA.1/2 wave)              | yes<br>(BNT <sub>bivalent</sub> ) | no                 | 33   | 186-215 <sup>b</sup> | 6435  |
|                                                    | 9480   | Male   | 54             | no information | yes<br>(BA.1/2 wave)              | yes<br>(BNT <sub>bivalent</sub> ) | no                 | 14   | 186-215 <sup>b</sup> | 6435  |

|  |      |        |    |                |                      |                                   |    |    |                      |       |
|--|------|--------|----|----------------|----------------------|-----------------------------------|----|----|----------------------|-------|
|  | 9490 | Male   | 49 | no information | yes<br>(BA.1/2 wave) | yes<br>(BNT <sub>bivalent</sub> ) | no | 26 | 247-274 <sup>b</sup> | 13795 |
|  | 9492 | Male   | 50 | no information | yes<br>(BA.1/2 wave) | yes<br>(BNT <sub>bivalent</sub> ) | no | 33 | 216-246 <sup>b</sup> | 8372  |
|  | 9497 | Female | 50 | no information | yes<br>(BA.1/2 wave) | yes<br>(BNT <sub>bivalent</sub> ) | no | 33 | 104                  | 15010 |

<sup>a</sup>: SARS-CoV-2 infection-free status of V1/V2/V3, V1/V2/V3/V4<sub>monovalent</sub> and V1/V2/V3/V4<sub>bivalent</sub> cohorts was confirmed by ELISA (anti-NCP-negative).

<sup>b</sup>: Only the information of the month of positive PCR testing was available.

Abbreviations: AZ, AZD1222/Vaxzevria; BNT, BNT162b2/Comirnaty; MOD, mRNA-1273/Spikevax; BNT<sub>bivalent</sub>, Comirnaty Original/Omicron BA.4-5; BAU, binding antibody units; BTI, breakthrough infection;

**Table 2**

**Table 2: Cohort characteristics.**

|                                                  |                            | Cohort               |                     |                     |                     |                     |                     |                      |
|--------------------------------------------------|----------------------------|----------------------|---------------------|---------------------|---------------------|---------------------|---------------------|----------------------|
|                                                  |                            | A                    | B                   | C                   | D                   | E                   | F                   | G                    |
| <b>Participants (n)</b>                          |                            | <b>16</b>            | <b>17</b>           | <b>27</b>           | <b>11</b>           | <b>8</b>            | <b>21</b>           | <b>10</b>            |
| <b>Gender</b>                                    | <b>Male (n)</b>            | <b>5</b>             | <b>4</b>            | <b>5</b>            | <b>5</b>            | <b>3</b>            | <b>9</b>            | <b>4</b>             |
|                                                  | <b>Male (%)</b>            | <b>31.3</b>          | <b>23.5</b>         | <b>18.5</b>         | <b>45.5</b>         | <b>37.5</b>         | <b>42.9</b>         | <b>36.4</b>          |
|                                                  | <b>Female (n)</b>          | <b>11</b>            | <b>13</b>           | <b>22</b>           | <b>6</b>            | <b>5</b>            | <b>12</b>           | <b>7</b>             |
|                                                  | <b>Female (%)</b>          | <b>68.8</b>          | <b>76.5</b>         | <b>81.5</b>         | <b>54.5</b>         | <b>62.5</b>         | <b>57.1</b>         | <b>63.6</b>          |
| <b>Age (years)</b>                               | <b>Median</b>              | <b>52</b>            | <b>38</b>           | <b>38</b>           | <b>49</b>           | <b>40.5</b>         | <b>54</b>           | <b>48.5</b>          |
|                                                  | <b>Range</b>               | <b>27-59</b>         | <b>22-50</b>        | <b>24-63</b>        | <b>27-65</b>        | <b>29-59</b>        | <b>38-68</b>        | <b>40-58</b>         |
|                                                  | <b>25%; 75% Percentile</b> | <b>38; 55.5</b>      | <b>35; 40.5</b>     | <b>34; 51</b>       | <b>38; 58</b>       | <b>30.3; 53.5</b>   | <b>48; 60</b>       | <b>43.5; 51</b>      |
| <b>Time since last immunisation event (days)</b> | <b>Median</b>              | <b>14</b>            | <b>31</b>           | <b>31</b>           | <b>33</b>           | <b>39.5</b>         | <b>29</b>           | <b>33</b>            |
|                                                  | <b>Range</b>               | <b>13-45</b>         | <b>8-62</b>         | <b>10-59</b>        | <b>2-51</b>         | <b>8-60</b>         | <b>11-33</b>        | <b>14-33</b>         |
|                                                  | <b>25%; 75% Percentile</b> | <b>14; 24</b>        | <b>22; 46</b>       | <b>22; 49</b>       | <b>9; 42</b>        | <b>18.8; 47.3</b>   | <b>26.5; 33</b>     | <b>26; 33</b>        |
| <b>Total SARS-CoV-2 B.1 S1 IgG (BAU/ml)</b>      | <b>Median</b>              | <b>4,707</b>         | <b>4,072</b>        | <b>4,974</b>        | <b>4,709</b>        | <b>5,908</b>        | <b>5,104</b>        | <b>7,462</b>         |
|                                                  | <b>Range</b>               | <b>3,048 - 7,420</b> | <b>1,713-9,237</b>  | <b>1,602-7,600</b>  | <b>1,668-11,368</b> | <b>1,596-12,250</b> | <b>2,374-12,697</b> | <b>5,431-15,010</b>  |
|                                                  | <b>25%; 75% Percentile</b> | <b>4,108; 5,873</b>  | <b>2,403; 6,303</b> | <b>4,170; 6,618</b> | <b>1,931; 7,836</b> | <b>2,165; 9,568</b> | <b>2,791; 7,887</b> | <b>6,435; 11,589</b> |

Cohorts: A, V1/V2/V3; B, V1/V2/V3 + BTI(BA.1/BA.2); C, V1/V2/V3 + BTI(BA.5); D, V1/V2/V3/V4<sub>monovalent</sub>; E, V1/V2/V3/V4<sub>monovalent</sub> + BTI(BA.5); F, V1/V2/V3/V4<sub>bivalent</sub>; G, V1/V2/V3 + BTI(BA.1/BA.2) + V4<sub>bivalent</sub>.



**Table 3**

**Table 3: Median fold change in NT50 versus B.1.**

| Cohort   | Median Fold Change in NT50 vs. B.1 (95% CI) |                          |                            |                            |                              |                            |                              |
|----------|---------------------------------------------|--------------------------|----------------------------|----------------------------|------------------------------|----------------------------|------------------------------|
|          | B.1                                         | BA.1                     | BA.4; BA.5                 | BA.4.6                     | BA.2.75.2                    | BJ.1                       | BQ.1.1                       |
| <b>A</b> | 1,0x<br>(1.0x; 1.0x)                        | -6,6x<br>(-5.3x; -8.6x)  | -20,2x<br>(-13.1x; -28.4x) | -32,7x<br>(-20.8x; -41.2x) | -573,0x<br>(-47.2x; -1,426x) | -25,5x<br>(-19.8x; -38.8x) | -103,2x<br>(-60.8x; -1,029x) |
| <b>B</b> | 1,0x<br>(1.0x; 1.0x)                        | -2,6x<br>(-2.0x; -4.2x)  | -6,0x<br>(-4.3x; -9.4x)    | -8,8x<br>(-6.0x; -15.8x)   | -35,1x<br>(-22.1x; -91.2x)   | -12,9x<br>(-7.9x; -18.6x)  | -30,8x<br>(-19.5x; -87.7x)   |
| <b>C</b> | 1,0x<br>(1.0x; 1.0x)                        | -4,3x<br>(-3.0x; -5.8x)  | -4,0x<br>(-3.2x; -4.5x)    | -5,1x<br>(-4.0x; -6.6x)    | -36,9x<br>(-28.3x; -42.3x)   | -6,5x<br>(-5.8x; -10.9x)   | -22,7x<br>(-16.3x; -27.6x)   |
| <b>D</b> | 1,0x<br>(1.0x; 1.0x)                        | -7,1x<br>(-4.1x; -8.7x)  | -10,4x<br>(-6.6x; -18.2x)  | -16,7x<br>(-10.5x; -30.7x) | -57,4x<br>(-40.6x; -849x)    | -10,9x<br>(-8.0x; -23.4x)  | -96,8x<br>(-23.6x; -849x)    |
| <b>E</b> | 1,0x<br>(1.0x; 1.0x)                        | -5,1x<br>(-2.3x; -17.4x) | -5,6x<br>(-2.2x; -20.9x)   | -7,0x<br>(-2.3x; -20.9x)   | -54,0x<br>(-18.7x; -824x)    | -13,1x<br>(-2.3x; -35.1x)  | -31,5x<br>(-16.2x; -1,652x)  |
| <b>F</b> | 1,0x<br>(1.0x; 1.0x)                        | -3,4x<br>(-2.7x; -4.9x)  | -4,8x<br>(-3.6x; -8.9x)    | -9,6x<br>(-5.1x; -11.9x)   | -40,2x<br>(-18.3x; -702x)    | -6,2x<br>(-4.2x; -9.2x)    | -32,3x<br>(-18.2x; -448x)    |
| <b>G</b> | 1,0x<br>(1.0x; 1.0x)                        | -2,1x<br>(-1.4x; -2.8x)  | -3,0x<br>(-2.1x; -4.6x)    | -5,7x<br>(-3.3x; -7.2x)    | -17,4x<br>(-9.2x; -30.5x)    | -4,3x<br>(-2.0x; -6.7x)    | -11,7x<br>(-8.1x; -22.9x)    |

Cohorts: A, V1/V2/V3; B, V1/V2/V3 + BTI(BA.1/BA.2); C, V1/V2/V3 + BTI(BA.5); D, V1/V2/V3/V4<sub>monovalent</sub>; E, V1/V2/V3/V4<sub>monovalent</sub> + BTI(BA.5); F, V1/V2/V3/V4<sub>bivalent</sub>; G, V1/V2/V3 + BTI(BA.1/BA.2) + V4<sub>bivalent</sub>.  
Abbreviation: 95% CI, 95% confidence interval.

**Table 4**

**Table 4: Median fold change in NT50 versus BA.4-5.**

| Cohort   | Median Fold Change in NT50 vs. BA.4; BA.5 (95% CI) |                         |                      |                         |                           |                         |                          |
|----------|----------------------------------------------------|-------------------------|----------------------|-------------------------|---------------------------|-------------------------|--------------------------|
|          | B.1                                                | BA.1                    | BA.4-5               | BA.4.6                  | BA.2.75.2                 | BJ.1                    | BQ.1.1                   |
| <b>A</b> | +20,2x<br>(+13.1x; +28.4x)                         | +3,0x<br>(+2.1x; +3.9x) | 1,0x<br>(1.0x; 1.0x) | -1,6x<br>(-1.5x; -1.7x) | -15,5x<br>(-4.5x; -83.1x) | -1,4x<br>(-1.9x; 1.0x)  | -6,2x<br>(-3.4x; -24.5x) |
| <b>B</b> | +6,0x<br>(+4.3x; +9.4x)                            | +2,3x<br>(+1.5x; +2.9x) | 1,0x<br>(1.0x; 1.0x) | -1,4x<br>(-1.3x; -1.6x) | -4,6x<br>(-3.7x; -13.3x)  | -1,7x<br>(-1.4x; -2.2x) | -4,6x<br>(-3.3x; -10.6x) |
| <b>C</b> | +4,0x<br>(+3.2x; +4.5x)                            | +1,0x<br>(-1.4x; +1.2x) | 1,0x<br>(1.0x; 1.0x) | -1,3x<br>(-1.2x; -1.5x) | -10,8x<br>(-7.8x; -12.2x) | -2,2x<br>(-1.5x; -2.9x) | -5,5x<br>(-4.3x; -6.5x)  |
| <b>D</b> | +10,4x<br>(+6.6x; +18.2x)                          | +1,5x<br>(1.0x; +2.6x)  | 1,0x<br>(1.0x; 1.0x) | -1,6x<br>(-1.3x; -2.5x) | -8,7x<br>(-3.0x; -41.1x)  | -1,0x<br>(-2.2x; +1.3x) | -7,9x<br>(-3.5x; -41.1x) |
| <b>E</b> | +5,6x<br>(+2.2x; +20.9x)                           | +1,1x<br>(-1.4x; +2.4x) | 1,0x<br>(1.0x; 1.0x) | -1,2x<br>(-2.3x; +1.2x) | -9,9x<br>(-6.0x; -39.5x)  | -1,7x<br>(-4.8x; +1.3x) | -8,2x<br>(-2.6x; -357x)  |
| <b>F</b> | +4,8x<br>(+3.6x; +8.9x)                            | +1,4x<br>(-1.1x; +1.6x) | 1,0x<br>(1.0x; 1.0x) | -1,6x<br>(-1.3x; -1.8x) | -8,5x<br>(-3.8x; -107x)   | -1,3x<br>(-1.7x; +1.1x) | -5,9x<br>(-3.6x; -11.2x) |
| <b>G</b> | +3,0x<br>(+2.1x; +4.6x)                            | +1,5x<br>(+1.1; +2.8x)  | 1,0x<br>(1.0x; 1.0x) | -1,6x<br>(-2.1x; +1.1x) | -5,0x<br>(-3.6x; -7.9x)   | -1,2x<br>(-1.9x; +1.1x) | -3,5x<br>(-2.9x; -7.1x)  |

Cohorts: A, V1/V2/V3; B, V1/V2/V3 + BTI(BA.1/BA.2); C, V1/V2/V3 + BTI(BA.5); D, V1/V2/V3/V4<sub>monovalent</sub>; E, V1/V2/V3/V4<sub>monovalent</sub> + BTI(BA.5); F, V1/V2/V3/V4<sub>bivalent</sub>; G, V1/V2/V3 + BTI(BA.1/BA.2) + V4<sub>bivalent</sub>.  
Abbreviation: 95% CI, 95% confidence interval.

## Methods

### Cell culture

Vero (African green monkey kidney, female, kidney; CRL-1586, ATCC; RRID: CVCL 0574, kindly provided by Andrea Maisner) and 293T cells (human, female, kidney; ACC-635, DSMZ; RRID: CVCL 0063) were cultured in Dulbecco's modified Eagle medium (PAN-Biotech), supplemented with 10% fetal bovine serum (Biochrom), 100 U/ml of penicillin, and 0.1 mg/ml of streptomycin (PAN-Biotech) at 37 °C in a humidified atmosphere containing 5% CO<sub>2</sub>. Validation of cell lines was performed by STR analysis, partial sequencing of the cytochrome c oxidase gene, microscopic examination, and/or according to cell line-specific growth characteristics. Cell lines were routinely tested for mycoplasma contamination. 293T cells were transfected by calcium phosphate precipitation.

### Expression plasmids and sequence analysis

Information on S protein sequences was retrieved from GISAID (Global Initiative on Sharing All Influenza Data) (<https://gisaid.org/>) and CoV-Spectrum (<https://cov-spectrum.org/>) databases. Expression plasmids pCAGGS-DsRed<sup>1</sup>, pCG1-SARS-CoV-2 B.1 SΔ18 (codon-optimised, C-terminal truncation of 18 amino acid residues, GISAID Accession ID: EPI\_ISL\_425259)<sup>2</sup>, pCG1-SARS-CoV-2 BA.1 SΔ18 (codon-optimised, C-terminal truncation of 18 amino acid residues, GISAID Accession ID: EPI\_ISL\_6640919)<sup>3</sup>, pCG1-SARS-CoV-2 BA.4-5 SΔ18 (codon-optimised, C-terminal truncation of 18 amino acid residues, GISAID Accession ID: EPI\_ISL\_11550739 and EPI\_ISL\_12029894)<sup>4</sup> and pCG1-SARS-CoV-2 BA.4.6 SΔ18 (codon-optimised, C-terminal truncation of 18 amino acid residues, GISAID Accession ID: EPI\_ISL\_14429885)<sup>5</sup> have been described elsewhere. In addition, expression plasmids for SARS-CoV-2 BA.2.75.2 SΔ18 (GISAID Accession ID: EPI\_ISL\_15019960), SARS-CoV-2 BJ.1 SΔ18 (GISAID Accession ID: EPI\_ISL\_14913530) and SARS-CoV-2 BQ.1.1 SΔ18 (GISAID Accession ID: EPI\_ISL\_14752457) were generated by Gibson assembly. For this, overlapping DNA strings were synthesised (five strings for each S protein; Thermo Fisher Scientific, sequences available upon request). Gene strings and linearised (BamHI/XbaI digest) pCG1 plasmid (a kind gift of Roberto Cattaneo, Mayo Clinic College of Medicine, Rochester, MN, USA) were mixed with GeneArt™ Gibson Assembly HiFi Master Mix (Thermo Fisher Scientific) and the assembly was carried out according to manufacturer's

instructions. All S protein sequences were verified by Sanger sequencing using a commercial service (Microsynth SeqLab).

### **Pseudovirus particle production**

Vesicular stomatitis virus pseudotype particles bearing SARS-CoV-2 S proteins were produced according to a published protocol<sup>6</sup>. 293T cells expressing the respective S protein or DsRed (negative control) upon transfection were inoculated with VSV-G-transcomplemented VSV\* $\Delta$ G(FLuc) (kindly provided by Gert Zimmer)<sup>7</sup> at a multiplicity of infection of 3. The inoculum was removed after 1h of incubation and cells were washed with PBS and medium containing anti-VSV-G antibody (culture supernatant from I1-hybridoma cells; ATCC no. CRL-2700) was added. After 16-18h of incubation, cell culture supernatants were collected, clarified by centrifugation (4,000 x g, 10 min), and stored at -80 °C until further use.

### **Neutralisation assay**

Neutralisation assays were performed in 96-well format according to a previously published protocol<sup>8</sup>. First, pseudotype particles bearing the respective S proteins were pre-incubated (30 min at 37°C) with different dilutions of heat-inactivated blood plasma (56 °C, 30 min), starting at a plasma dilution of either 1:25 or 1:50. Subsequently, the mixtures were added to confluent Vero cell layers. At 16–18 h postinoculation, the culture medium was aspirated and cells were lysed by incubation (30 min, room temperature) with PBS containing 0.5% Triton X-100 (Carl Roth). Next, lysates were transferred into white 96-well plates, and firefly luciferase substrate (Beetle-Juice, PJK) was added, before luminescence was recorded using a Hidex Sense plate luminometer (Hidex). Neutralisation efficiency was determined based on the relative inhibition of pseudovirus entry, using pseudovirus particles incubated in the absence of plasma as reference (= 0% inhibition). Samples that yielded an NT50 value lower than 6.25 (for samples with a starting dilution of 1:25) or 12.5 (for samples with a starting dilution of 1:50) were considered negative and were assigned an NT50 value of 1.

### **Ethics committee approval and enrolment of study participants**

Collection of plasma samples was performed after approval by the research ethics committee of the Institutional Review Board of MHH (8973 BO K 2020). Each participant provided written informed

consent prior to the use of plasma samples for research. Participants for this analysis were from the COVID-19 Contact (CoCo) Study (German Clinical Trial Registry, DRKS00021152), which started in March 2020 and is an ongoing, prospective observational study monitoring anti-SARS-CoV-2 IgG and immune responses in health care professionals (HCP) at Hannover Medical School and individuals with potential contact to SARS-CoV-2<sup>9,10</sup>. Participants provide regularly blood samples for anti-Spike IgG and anti-nucleocapsid (NCP) IgG assessment. In addition, self-reported information about COVID-19 vaccinations and SARS-CoV-2 infection history including symptoms were collected via standardized questionnaires.

### **Plasma samples**

All plasma samples were pre-screened for SARS-CoV-2 S1-specific IgG using the anti-SARS-CoV-2-QuantiVac-ELISA (IgG) (EUROIMMUN). A total of seven cohorts were tested. All plasma samples were collected within two months post vaccination/breakthrough infection (BTI); (i) cohort 1 (V1/V2/V3): individuals vaccinated with either one dose of AZD1222/Vaxzevria followed by two doses of BNT162b2/Comirnaty, two doses of AZD1222/Vaxzevria followed by one dose of BNT162b2/Comirnaty, or three doses of BNT162b2/Comirnaty (n = 16; median age = 52 years; male to female ratio 5:11); (ii) cohort 2 (V1/V2/V3 + BTI<sub>BA.1/BA.2</sub>): individuals with a history of three vaccinations that experienced a BTI during the BA.1/BA.2 wave (January to May 2022 in Germany) (n = 17; median age = 38 years; male to female ratio 4:13); (iii) cohort 3 (V1/V2/V3 + BTI<sub>BA.5</sub>): individuals with a history of three vaccinations that experienced a BTI during the BA.5 wave (June 2022 to present [November 2022] in Germany) (n = 27; median age = 38 years; male to female ratio 5:22); (iv) cohort 4 (V1/V2/V3/V4<sub>monovalent</sub>): individuals that received a fourth vaccination with the monovalent BNT162b2/Comirnaty vaccine (n = 11; median age = 49 years; male to female ratio 5:6); (v) cohort 4 (V1/V2/V3/V4<sub>monovalent</sub> + BTI<sub>BA.5</sub>): individuals that received a fourth vaccination with the monovalent BNT162b2/Comirnaty vaccine and experienced a BTI during the BA.5 wave (n = 8; median age = 40.5 years; male to female ratio 3:5); (vi) cohort 6 (V1/V2/V3/V4<sub>bivalent</sub>): individuals that received a fourth vaccination with the B.1/BA.4-5 bivalent BNT162b2/Comirnaty Original/Omicron BA.4-5 vaccine (n = 21; median age = 54 years; male to female ratio 9:12); (vii) cohort 7 (V1/V2/V3 + BTI<sub>BA.1/BA.2</sub> + V4<sub>bivalent</sub>): individuals with a history of three vaccinations that experienced a BTI during the BA.1/BA.2 wave and

later received a fourth vaccination with the B.1/BA.4-5 bivalent BNT162b2/Comirnaty Original/Omicron BA.4-5 vaccine (n = 11; median age = 48.5 years; male to female ratio 4:7). Individual information on the plasma samples can be found in the Appendix Table. SARS-CoV-2 infection-free history of V1/V2/V3, V1/V2/V3/V4<sub>monovalent</sub> and V1/V2/V3/V4<sub>bivalent</sub> cohorts was confirmed by absence of anti-SARS-CoV-2 NCP IgG using the anti-SARS-CoV-2 ELISA (NCP) (EUROIMMUN).

### **Data analysis**

Data were analysed using Microsoft Excel (part of Microsoft Office Professional Plus, version 2016, Microsoft Corporation) and GraphPad Prism version 8.3.0 (GraphPad Software). Plasma dilutions leading to half-maximal inhibition (neutralising titre 50, NT50) were calculated using a non-linear regression model. Statistical significance was assessed by Wilcoxon matched-pairs signed rank test or Kruskal-Wallis analysis with Dunn's multiple comparisons test. Only p values of 0.05 or lower were considered statistically significant (ns [not significant],  $p > 0.05$ ; \*,  $p \leq 0.05$ ; \*\*,  $p \leq 0.01$ ; \*\*\*,  $p \leq 0.001$ ).

## Limitations of the study

The following limitations apply to this study. First, neutralisation of SARS-CoV-2 was analysed using pseudotype particles bearing SARS-CoV-2 S protein, instead of authentic SARS-CoV-2 isolates, which were not available to us. While pseudovirus particles were shown to faithfully recapitulate host cell entry and neutralisation of ancestral SARS-CoV-2, our data await formal confirmation with clinical isolates of SARS-CoV-2 Omicron sublineages. Second, due to lack of donor-matched samples following V3 and V4<sub>monovalent</sub>/V4<sub>bivalent</sub>, we were only able to indirectly assess the impact of mono- and bivalent vaccine boosters on SARS-CoV-2 neutralisation. Third, we did not investigate the impact of B.1/BA.1-based bivalent booster vaccination on SARS-CoV-2 neutralisation following standard three-dose vaccination with or without BTI. Fourth, all plasma samples were collected within 2 months post vaccination/infection. As a consequence, we cannot formally rule out that differences in the relative neutralisation efficiency among SARS-CoV-2 lineages may change over time. Sixth, while this study assessed neutralising activity in seven cohorts with diverse immunisation histories, sample size for each cohort is relatively small and minor differences with respect to age exist among cohorts. Therefore, additional data is needed to confirm results in larger cohorts that may also allow for assessment of potential age and/or gender-related effects.

## **Acknowledgements**

We gratefully acknowledge the originating laboratories responsible for obtaining the specimens, as well as the submitting laboratories where the genome data were generated and shared via GISAID, on which this research is based. We thank all study participants for their support and Janine Topal, Gema Morillas Ramos, Noemí Calderón Hampel and Metodi V. Stankov for technical and logistical help.



## Supplementary references

1. Hoffmann M, Kleine-Weber H, Schroeder S, et al. SARS-CoV-2 Cell Entry Depends on ACE2 and TMPRSS2 and Is Blocked by a Clinically Proven Protease Inhibitor. *Cell* 2020; **181**(2): 271-80 e8.
2. Hoffmann M, Arora P, Gross R, et al. SARS-CoV-2 variants B.1.351 and P.1 escape from neutralizing antibodies. *Cell* 2021; **184**(9): 2384-93 e12.
3. Hoffmann M, Kruger N, Schulz S, et al. The Omicron variant is highly resistant against antibody-mediated neutralization: Implications for control of the COVID-19 pandemic. *Cell* 2022; **185**(3): 447-56 e11.
4. Arora P, Kempf A, Nehlmeier I, et al. Augmented neutralisation resistance of emerging omicron subvariants BA.2.12.1, BA.4, and BA.5. *Lancet Infect Dis* 2022; **22**(8): 1117-8.
5. Arora P, Zhang L, Nehlmeier I, et al. The effect of cilgavimab and neutralisation by vaccine-induced antibodies in emerging SARS-CoV-2 BA.4 and BA.5 sublineages. *The Lancet Infectious diseases* 2022.
6. Kleine-Weber H, Elzayat MT, Wang L, et al. Mutations in the Spike Protein of Middle East Respiratory Syndrome Coronavirus Transmitted in Korea Increase Resistance to Antibody-Mediated Neutralization. *J Virol* 2019; **93**(2).
7. Berger Rentsch M, Zimmer G. A vesicular stomatitis virus replicon-based bioassay for the rapid and sensitive determination of multi-species type I interferon. *PLoS One* 2011; **6**(10): e25858.
8. Arora P, Zhang L, Rocha C, et al. Comparable neutralisation evasion of SARS-CoV-2 omicron subvariants BA.1, BA.2, and BA.3. *The Lancet Infectious diseases* 2022; **22**(6): 766-7.
9. Barros-Martins J, Hammerschmidt SI, Cossmann A, et al. Immune responses against SARS-CoV-2 variants after heterologous and homologous ChAdOx1 nCoV-19/BNT162b2 vaccination. *Nat Med* 2021; **27**(9): 1525-9.
10. Behrens GMN, Cossmann A, Stankov MV, et al. Strategic Anti-SARS-CoV-2 Serology Testing in a Low Prevalence Setting: The COVID-19 Contact (CoCo) Study in Healthcare Professionals. *Infect Dis Ther* 2020; **9**(4): 837-49.

## Supplementary figures

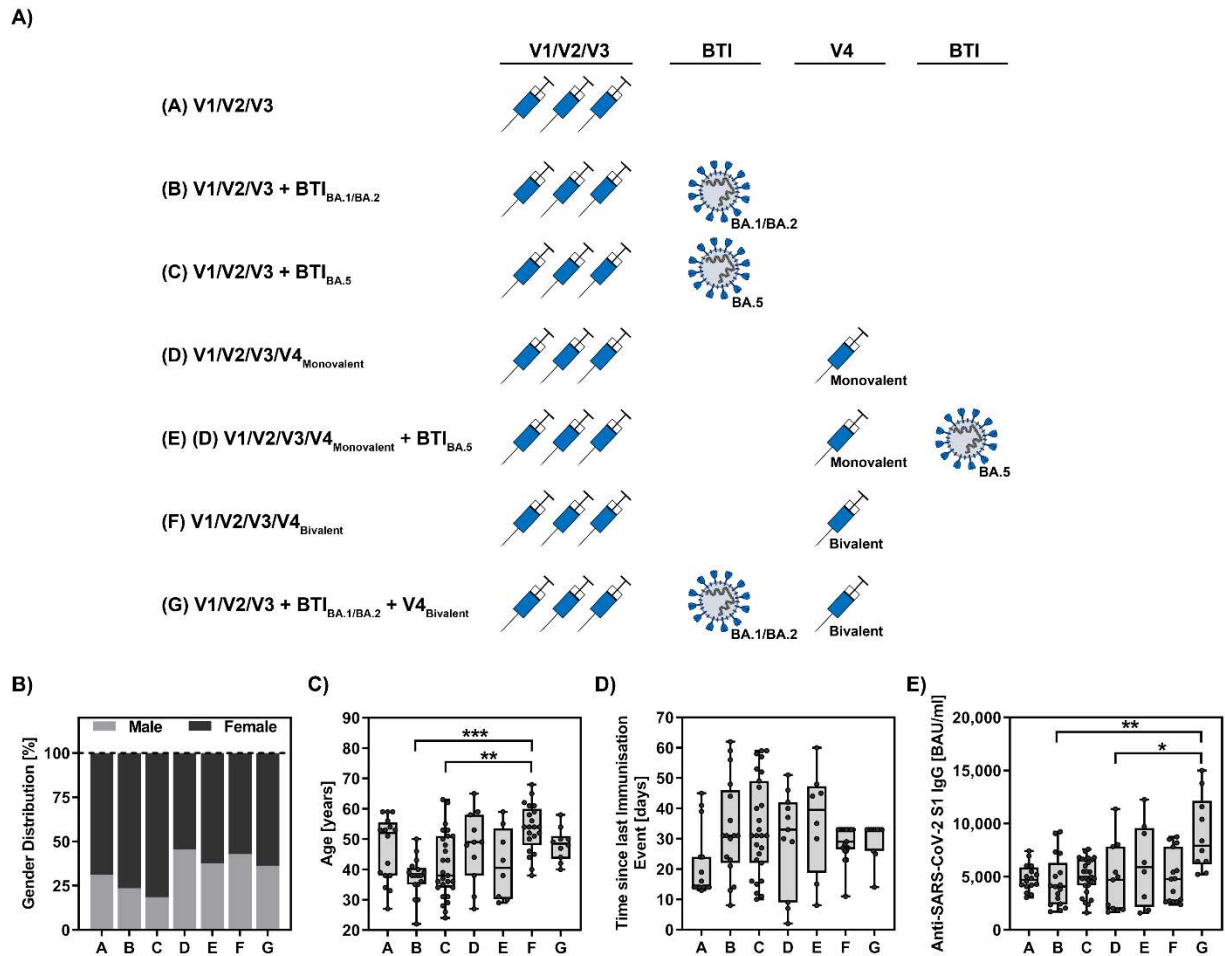

**Figure S1: Comparison of the cohorts.**

Schematic overview on the immunisation histories of the different cohorts (A) and comparison of cohorts regarding gender distribution (B), age (C), time between the last immunisation event and sampling (D), and total SARS-CoV-2 B.1 S1 IgG (E). Panels C-E: Box plots show median (black line) and 25%/75% quartiles, while bars indicate the range (circles represent individual samples). Statistical significance was assessed by Kruskal-Wallis analysis with Dunn's multiple comparisons test (not significant,  $p > 0.05$ ; \*,  $p \leq 0.05$ ; \*\*,  $p \leq 0.01$ ; \*\*\*,  $p \leq 0.001$ ; only data pairs with  $p$  values of 0.05 or lower are indicated).

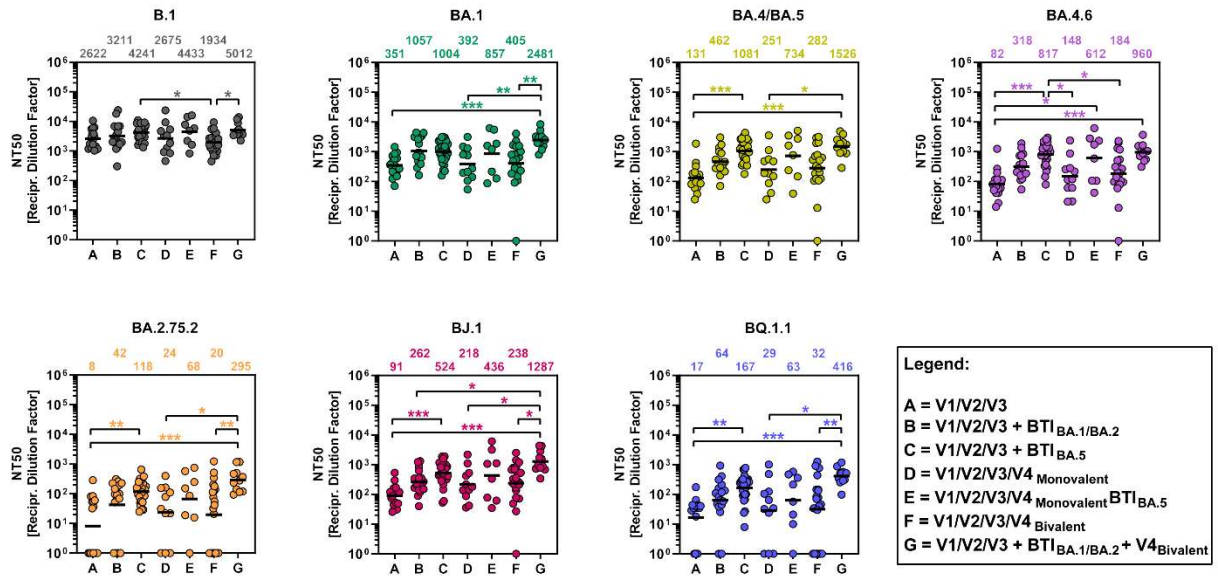

**Figure S2: Neutralisation efficiency of SARS-CoV-2 lineages.**

The data on neutralisation efficiency were re-grouped according to the respective SARS-CoV-2 lineage.

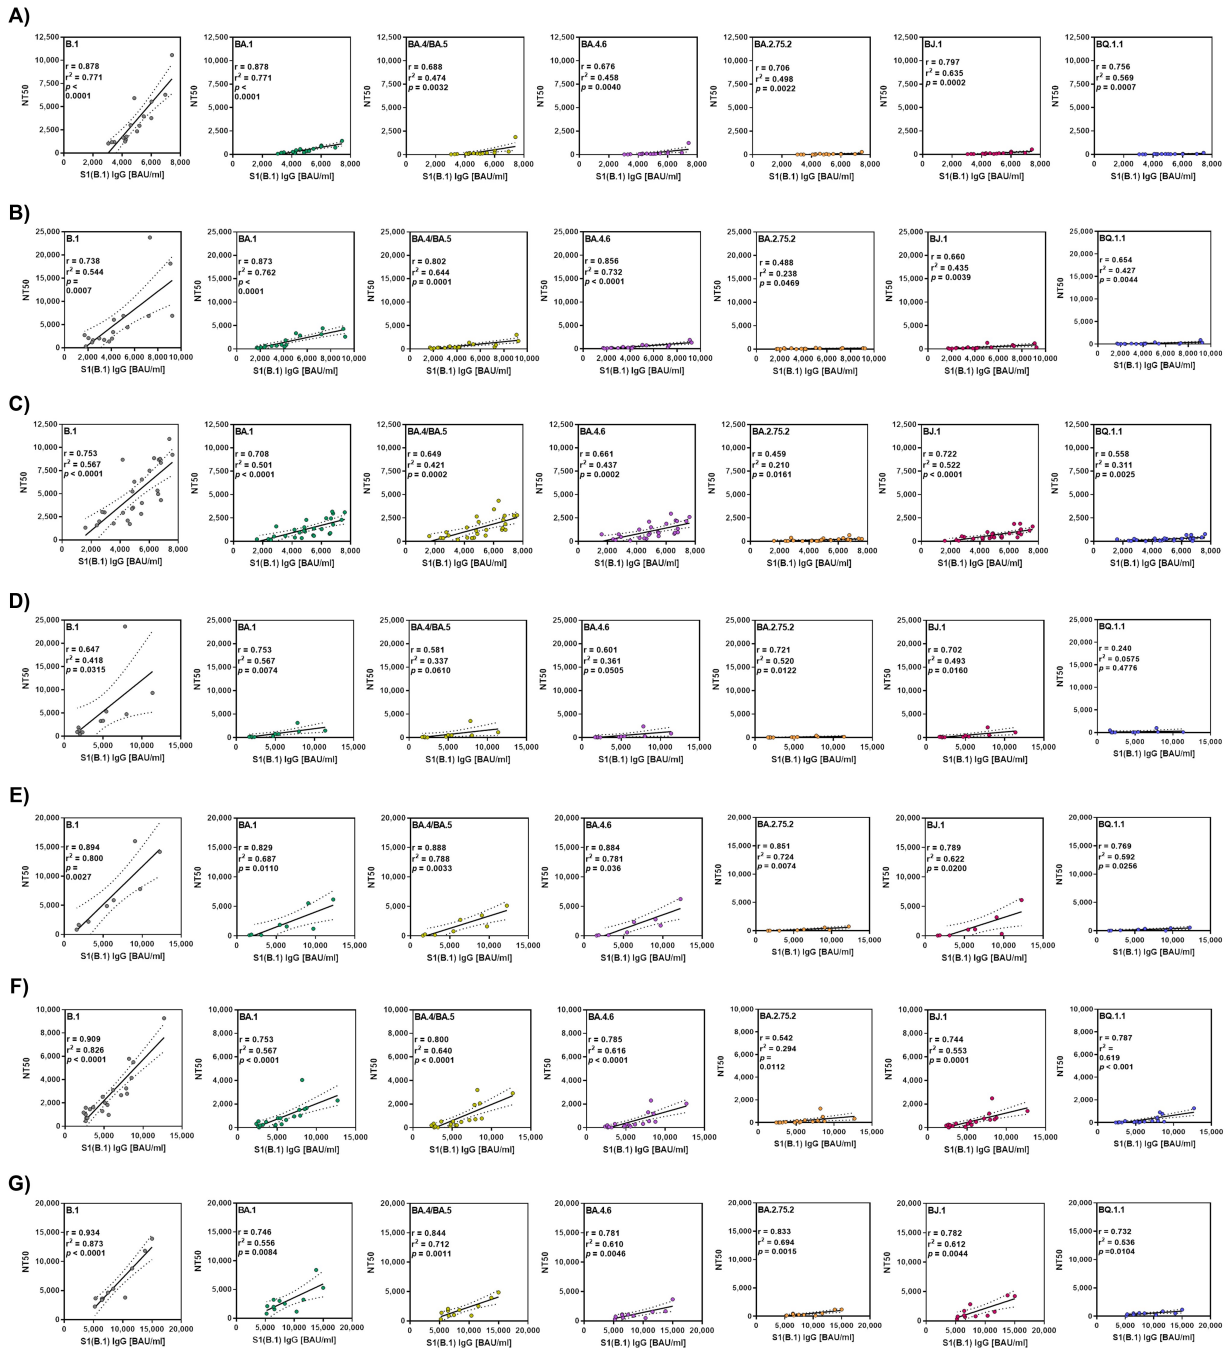

**Figure S3: Correlation of total SARS-CoV-2 B.1 S1 IgG and lineage-specific neutralisation activity.**

Total SARS-CoV-2 B.1 S1 IgG (given as BAU/ml) were quantified by ELISA and correlated with neutralisation activity against pseudoviruses bearing the S proteins of the indicated SARS-CoV-2 lineages. Cohorts:

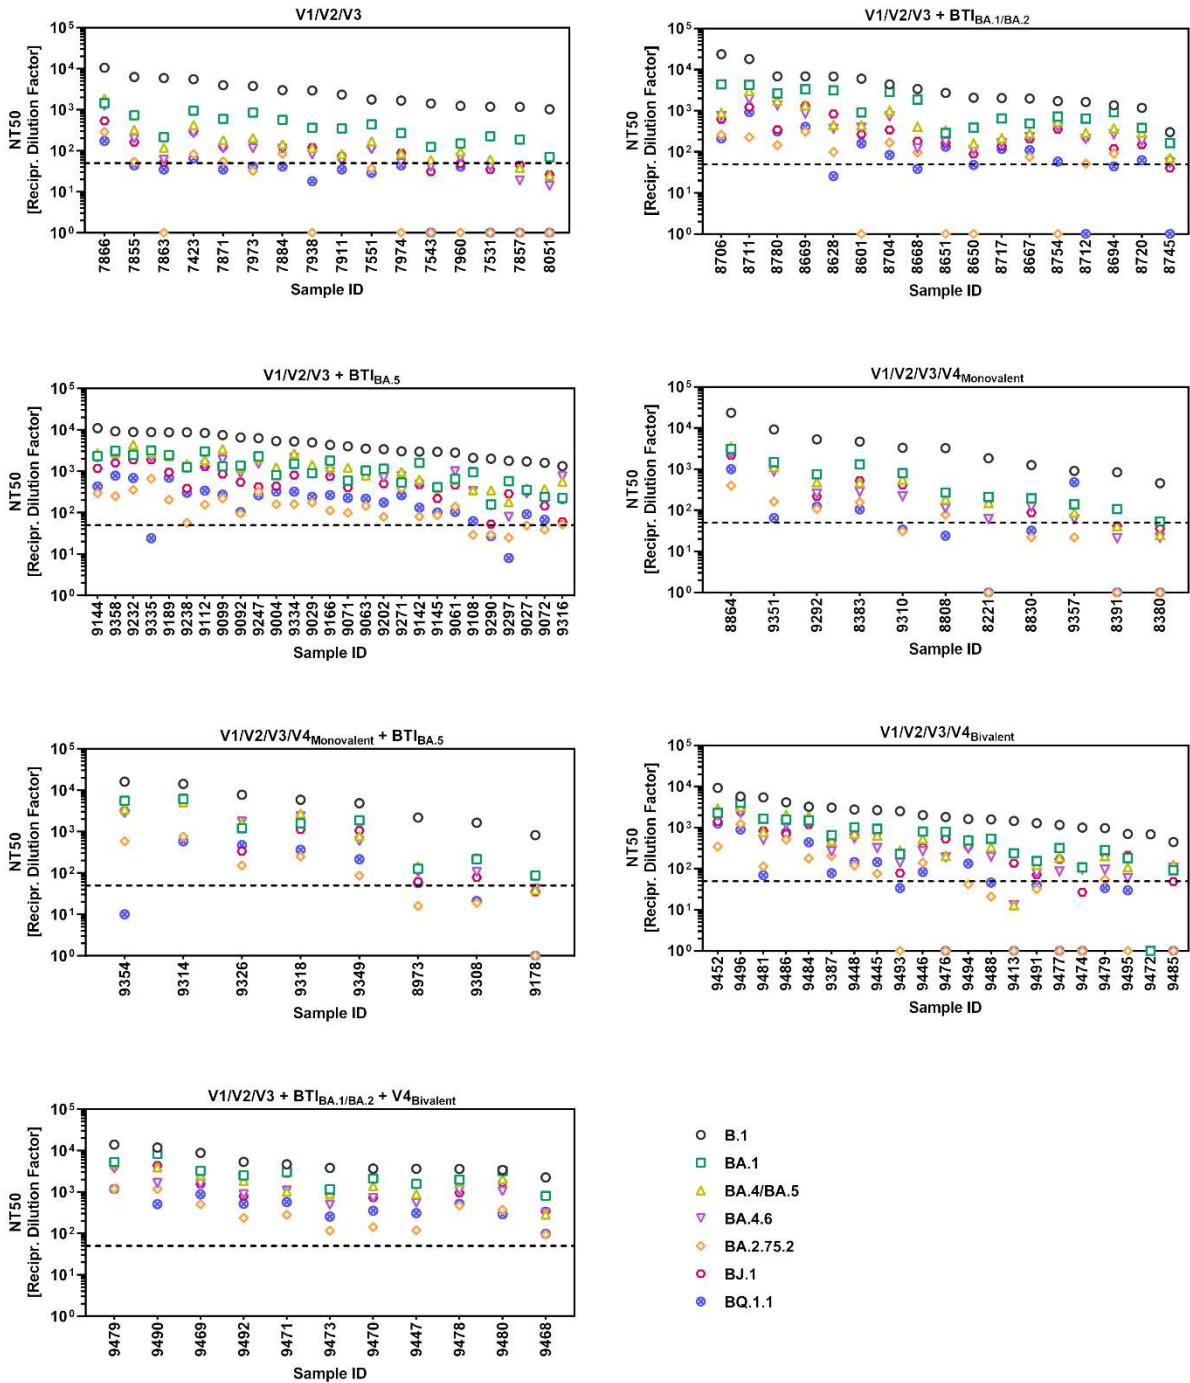

**Figure S4: Individual neutralisation data ranked according to B.1 neutralisation.**

Individual neutralisation data were ranked according to NT50 values for B.1 (from highest to lowest).

### V1/V2/V3

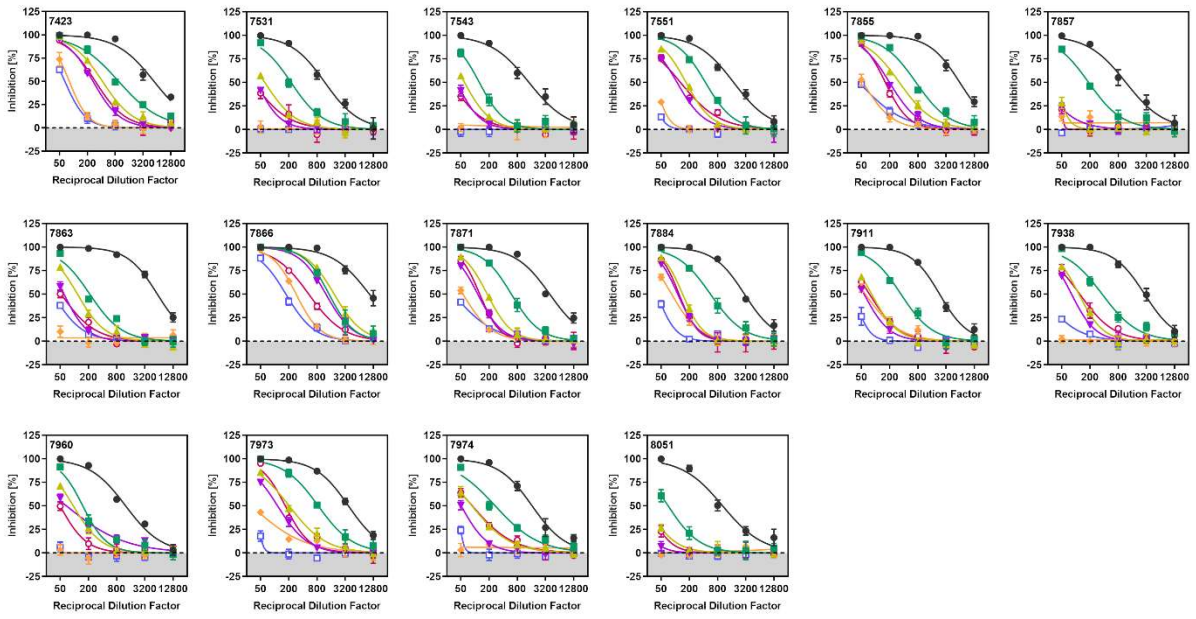

**Figure S5: Individual neutralisation data for cohort V1/V2/V3.**

Plasma-specific neutralisation data for SARS-CoV-2 lineages B.1 (dark grey), BA.1 (green), BA.4-5 (yellow), BA.4.6 (purple), BA.2.75.2 (orange), BJ.1 (pink), and BQ.1.1 (blue).

### V1/V2/V3 + BTI<sub>BA.1/BA.2</sub>

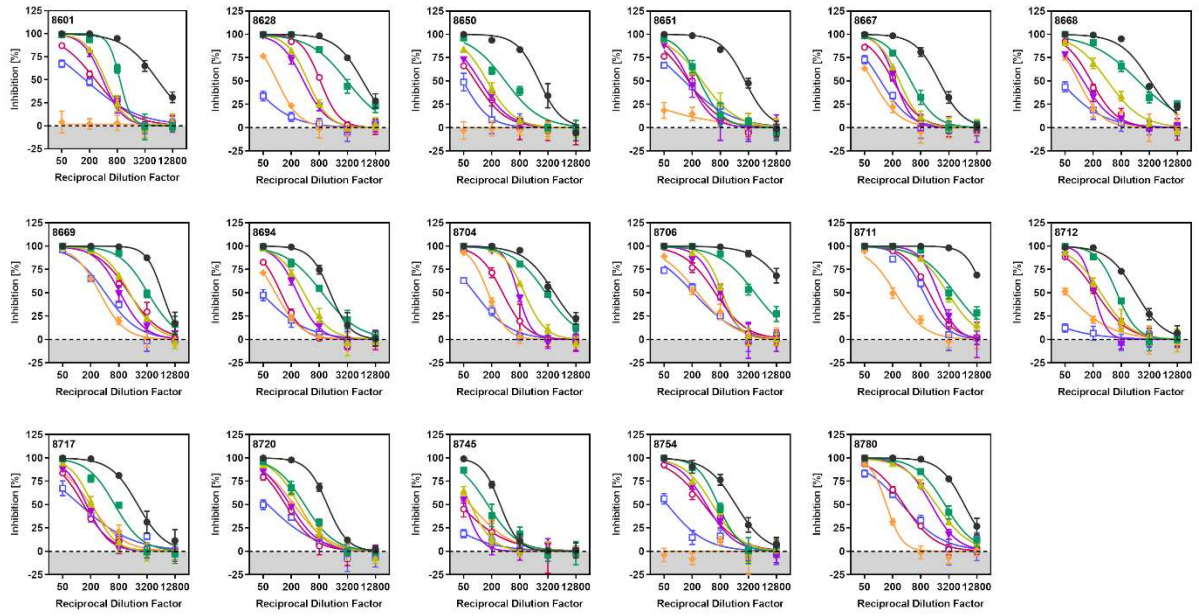

**Figure S6: Individual neutralisation data for cohort V1/V2/V3 + BTI<sub>BA.1/BA.2</sub>.**

Plasma-specific neutralisation data for SARS-CoV-2 lineages B.1 (dark grey), BA.1 (green), BA.4-5 (yellow), BA.4.6 (purple), BA.2.75.2 (orange), BJ.1 (pink), and BQ.1.1 (blue).

### V1/V2/V3 + BTI<sub>BA.5</sub>

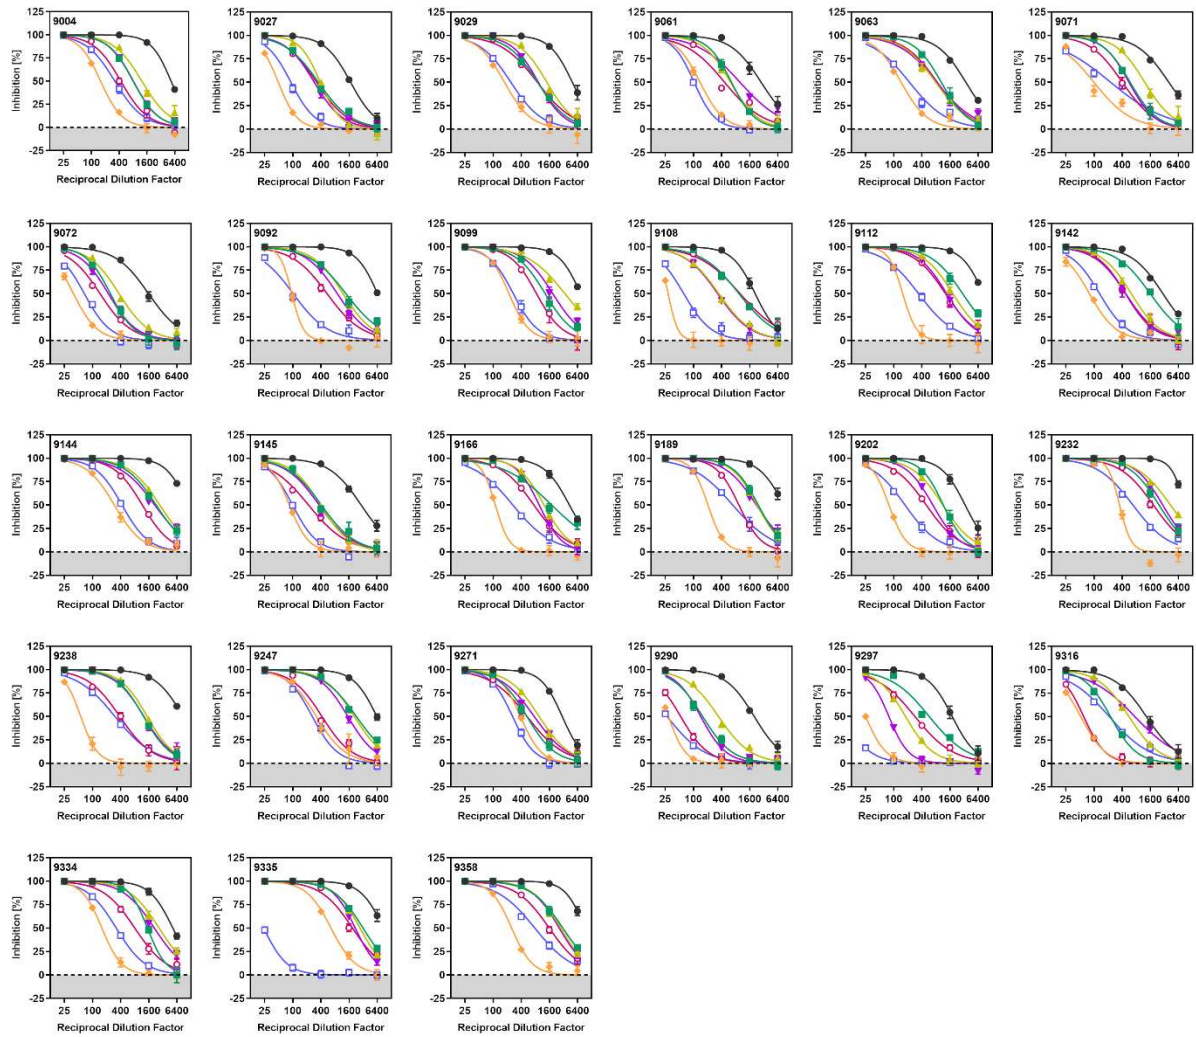

**Figure S7: Individual neutralisation data for cohort V1/V2/V3 + BTI<sub>BA.5</sub>.**

Plasma-specific neutralisation data for SARS-CoV-2 lineages B.1 (dark grey), BA.1 (green), BA.4-5 (yellow), BA.4.6 (purple), BA.2.75.2 (orange), BJ.1 (pink), and BQ.1.1 (blue).



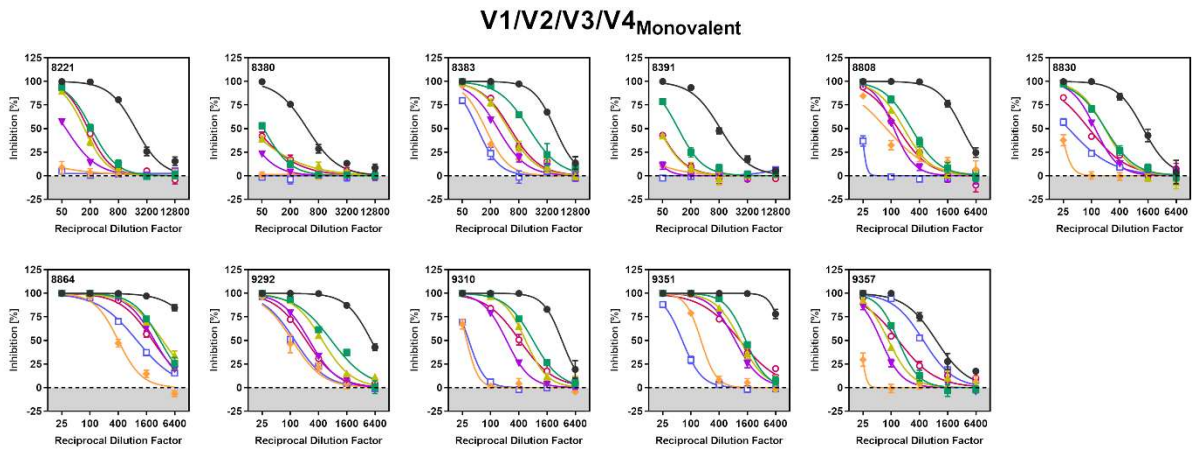

**Figure S8: Individual neutralisation data for cohort V1/V2/V3/V4<sub>Monovalent</sub>.**

Plasma-specific neutralisation data for SARS-CoV-2 lineages B.1 (dark grey), BA.1 (green), BA.4-5 (yellow), BA.4.6 (purple), BA.2.75.2 (orange), BJ.1 (pink), and BQ.1.1 (blue).

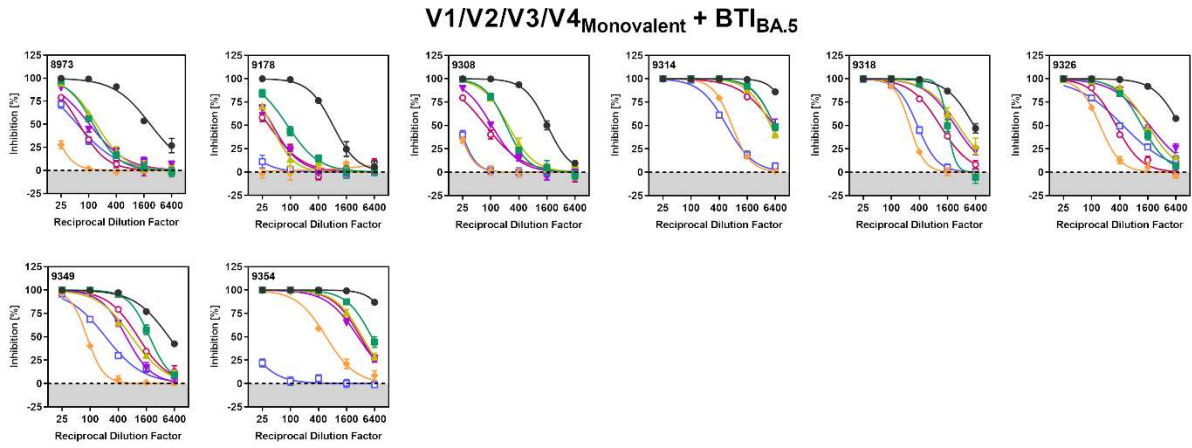

**Figure S9: Individual neutralisation data for cohort V1/V2/V3/V4<sub>Monovalent</sub> + BTI<sub>BA.5</sub>.**

Plasma-specific neutralisation data for SARS-CoV-2 lineages B.1 (dark grey), BA.1 (green), BA.4-5 (yellow), BA.4.6 (purple), BA.2.75.2 (orange), BJ.1 (pink), and BQ.1.1 (blue).

### V1/V2/V3/V4<sup>Bivalent</sup>

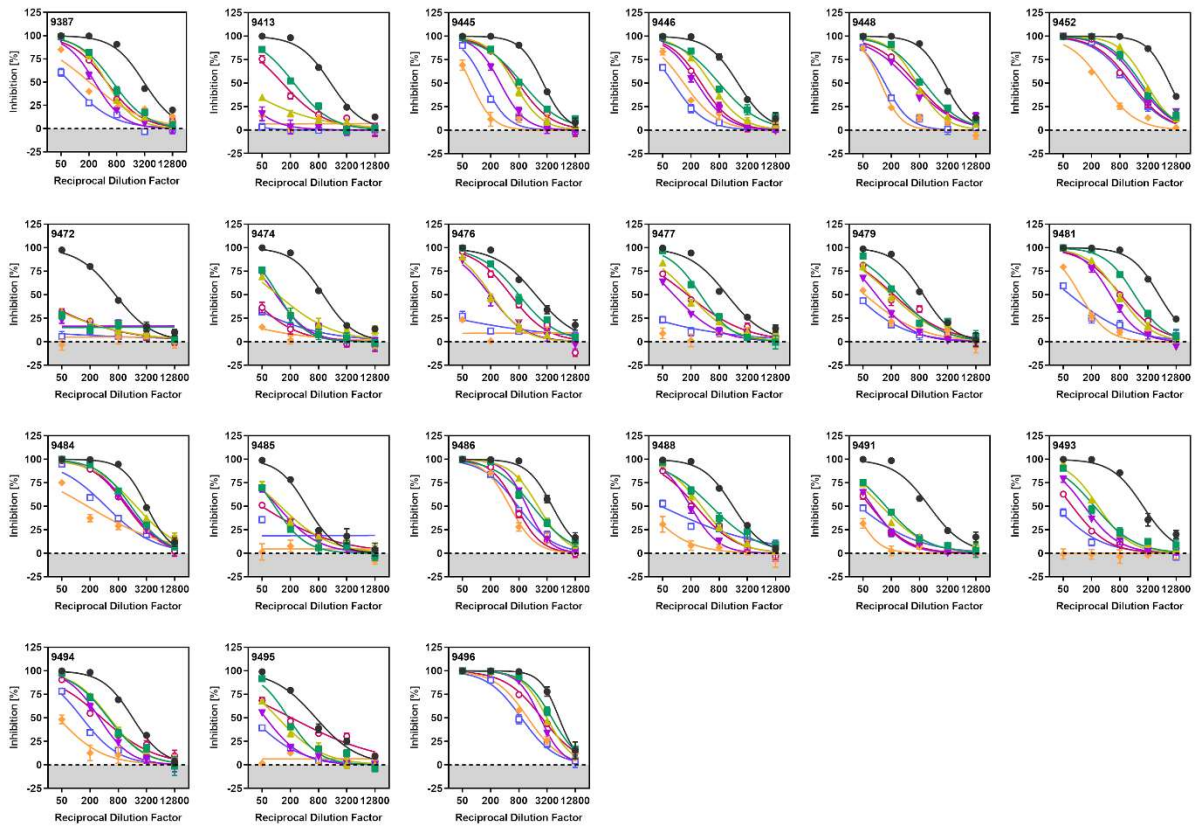

**Figure S10: Individual neutralisation data for cohort V1/V2/V3/V4<sup>Bivalent</sup>.**

Plasma-specific neutralisation data for SARS-CoV-2 lineages B.1 (dark grey), BA.1 (green), BA.4-5 (yellow), BA.4.6 (purple), BA.2.75.2 (orange), BJ.1 (pink), and BQ.1.1 (blue).

V1/V2/V3 + BTI<sub>BA.1/BA.2</sub> + V1/V2/V3/V4<sub>Bivalent</sub>

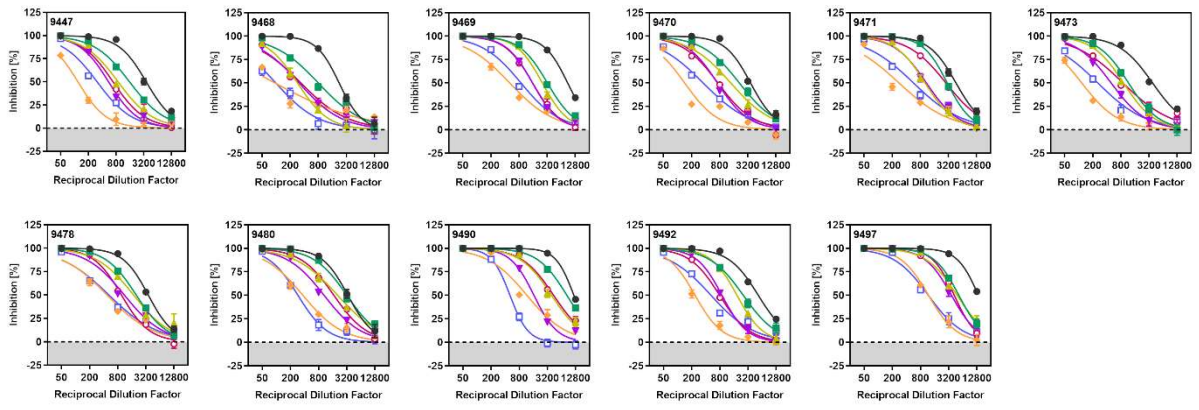

**Figure S11: Individual neutralisation data for cohort V1/V2/V3 + BTI<sub>BA.5</sub> + V4<sub>Bivalent</sub>.**

Plasma-specific neutralisation data for SARS-CoV-2 lineages B.1 (dark grey), BA.1 (green), BA.4-5 (yellow), BA.4.6 (purple), BA.2.75.2 (orange), BJ.1 (pink), and BQ.1.1 (blue).
